# Supplementary material
Source: publisher site journal article supplement (https://www.dovepress.com/article/426200)
Supplement: Supplementary file 1 [file get_supplementary_file.php]

**Supplemental Table 1.** Demographics, preoperative data, and postoperative data for dropless vs. conventional cataract surgery groups including only the first eye of each patient that received surgery

|  | Dropless  N = 112 eyes | Conventional  N = 173 eyes | *P*  value |
| --- | --- | --- | --- |
| Demographics  Age at time of surgery, years  Sex  Male  Race  White  Not White | 69.3 ± 11.2  55 (0.49)  96 (0.85)  16 (0.14) | 66.5 ± 12.7  78 (0.45)  155 (0.90)  18 (0.10) | **0.03***  0.54  >0.99 |
| Preoperative data  Operated eye  Right  Axial length of operated eye, mm  Baseline CDVA of operated eye, logMAR  Baseline IOP of operated eye, mmHg  Glaucoma or glaucoma suspect diagnosis  Glaucoma  Glaucoma suspect | 63 (0.56)  25.1 ± 2.3  0.4 ± 0.5  16.7 ± 3.2  24 (0.21)  11 (0.10)  13 (0.12) | 86 (0.50)  24.7 ± 2.1  0.5 ± 0.6  16.3 ± 3.6  42 (0.24)  20 (0.12)  22 (0.13) | 0.33  0.14  0.26  0.35  0.67  0.70  0.85 |
| Postoperative data  POM1 CDVA of operated eye, logMAR  Additional or prolonged steroid use post op  Use of IOP-lowering drops POD1-POM3a  POD1 IOP of operated eye, mmHg  POW1 IOP of operated eye, mmHg  POM1 IOP of operated eye, mmHg  Steroid responseb | 0.1 ± 0.2  14 (0.12)  14 (0.12)  20.9 ± 6.5  16.6 ± 3.4  16.7 ± 4.2  10 (0.09) | 0.2 ± 0.4  15 (0.09)  22 (0.13)  19.2 ± 6.1  15.6 ± 3.9  15.6 ± 3.6  11 (0.06) | **0.02***  0.32  >0.99  **0.03***  **0.03***  **0.02***  0.49 |

**Notes:** Data are reported as mean ± standard deviation for continuous variables and frequency count (fraction of total) for categorical variables.

*Statistically significant *P*-value < .05 (shown in bold font)

arefers to additional IOP-lowering drops above pre-op baseline

bdefined as IOP > 24 mmHg or IOP > 50% above baseline

**Abbreviations:** CDVA, corrected distance visual acuity; IOP, intraocular pressure; logMAR, logarithm of the minimum angle of resolution; POD1, postoperative day 1; POM1, postoperative month 1; POW1, postoperative week 1.

**Supplemental Table 2.** Predictors of steroid response in the first eye of each patient undergoing cataract surgery (univariate and multivariate analysis)

| **Predictor of steroid response** | **Univariate analysis** | | **Multivariate analysis** | |
| --- | --- | --- | --- | --- |
| **OR**  **(95% CI)**  **of steroid response** | ***P*-value** | **OR**  **(95% CI)**  **of steroid response** | ***P*-value** |
| Age: Per 1 Year Increase | 1.00 (0.97, 1.04) | 0.99 |  |  |
| Sex: Male (vs. Female) | 1.28 (0.52, 3.17) | 0.59 |  |  |
| Glaucoma Suspect Diagnosis: Yes vs. No | **4.21 (1.49, 11.07)** | **0.004*** | **5.83 (1.95, 16.92)** | **0.001*** |
| Glaucoma Diagnosis: Yes vs. No | 2.86 (0.87, 8.00) | 0.06 | **4.49 (1.30, 14.05)** | **0.012*** |
| Dropless Surgery: Yes vs. No | 1.44 (0.58, 3.54) | 0.42 |  |  |

**Notes:** *Statistically significant *P*-value < .05 (shown in bold font). Statistically significant confidence intervals shown in bold font.

**Abbreviations:** CI, confidence interval; IOP, intraocular pressure; logMAR, logarithm of the minimum angle of resolution; OR, odds ratio.

|  | Dropless with steroid response  N = 10 eyes | Conventional with steroid response  N = 11 eyes | *P*  value |
| --- | --- | --- | --- |
| Demographics  Age at time of surgery, years  Sex  Male  Race  White  Not White | 72.6 ± 7.9  5 (0.50)  9 (0.9)  1 (0.9) | 62.7 ± 17.6  6 (0.55)  10 (0.91)  1 (0.09) | 0.11  >0.99  0.82 |
| Preoperative data  Operated eye  Right  Axial length of operated eye, mm  Baseline CDVA of operated eye, logMAR  Baseline IOP of operated eye, mmHg  Glaucoma or glaucoma suspect diagnosis  Glaucoma  Glaucoma suspect | 6 (0.60)  25.3 ± 1.6  0.5 ± 0.3  16.4 ± 4.6  5 (0.50)  3 (0.30)  2 (0.20) | 5 (0.45)  25.6 ± 2.3  0.6 ± 0.7  15.0 ± 4.7  7 (0.64)  3 (0.20)  4 (0.27) | 0.67  0.69  0.49  0.50  0.67  >0.99  >0.99 |
| Postoperative data  POM1 CDVA of operated eye, logMAR  Additional or prolonged steroid use post op  Use of IOP lowering drops POD1-POM3  POD1 IOP of operated eye, mmHg  POW1 IOP of operated eye, mmHg  POM1 IOP of operated eye, mmHg  Duration of steroid response  <30 days  ≥30 days  Duration of steroid response, days | 0.2 ± 0.3  2 (0.20)  3 (0.30)  24.4 ± 10.8  20.1 ± 6.6  23.8 ± 6.6  3 (0.30)  7 (0.70)  48.0 ± 48.7 | 0.2 ± 0.3  2 (0.18)  7 (0.64)  24.4 ± 10.4  21.0 ± 5.4  21.1 ± 3.6  10 (0.91)  1 (0.09)  22.7 ± 3.4 | 0.84  >0.99  0.20  0.99  0.74  0.27  0.06  0.10 |

**Supplemental Table 3.** Characteristics of dropless vs. conventional cataract surgery eyes that developed steroid response. Data includes only the first eye of each patient receiving surgery

**Notes:** Data are reported as mean ± standard deviation for continuous variables and frequency count (fraction of total) for categorical variables.

**Abbreviations:** CDVA, corrected distance visual acuity; IOP, intraocular pressure; logMAR, logarithm of the minimum angle of resolution; POD1, postoperative day 1; POM1, postoperative month 1; POW1, postoperative week 1.
